# Supplementary material
Source: PubMed Central journal article supplement (PMC149826)
Supplement: nar_31_5_1387_v2_1.pdf [file nar_31_5_1387_v2_1.pdf]

Alignment of MaA81 sequences obtained from bisulphite treated DNA  
 All clones are from anlagen DNA. Clones are from different DNA preparations

|             |                                                       |     |
|-------------|-------------------------------------------------------|-----|
| MaA81       | CTGTGGCAACAGCTTCATGAGCAAGAACTCTCTAAGAAATCACAAGAGGA    | 50  |
| clone 32-88 | TTGTGGTAATAGTTTTATGAGTAAGAATTTTTTAAGAAATCACAAGAGGA    |     |
| clone 32-92 | TTGTGGTAATAGTTTTATGAGTAAGAATTTTTTAAGAAATCACAAGAGGA    |     |
| clone 32-93 | TTGTGGTAATAGTTTTATGAGTAAGAATTTTTTAAGAAATCACAAGAGGA    |     |
| clone 33-96 | TTGTGGTAATAGTTTTATGAGTAAGAATTTTTTAAGAAATCACAAGAGGA    |     |
| clone 33-98 | TTGTGGTAATAGTTTTATGAGTAAGAATTTTTTAAGAAATCACAAGAGGA    |     |
| MaA81       | AGTGCCTTAATTGGAATGAAGTATAGCTAGATCCTGGCTATCGAACAATAA   | 100 |
| clone 32-88 | AGTGCCTTAATTGGGATGAAGTATAGCTAGATTTTGGTTATTGAATAATAA   |     |
| clone 32-92 | AGTGCCTTAATTGGGATGAAGTATAGCTAGATTTTGGTTATTGAATAATAA   |     |
| clone 32-93 | AGTGCCTTAATTGGGATGAAGTATAGCTAGATTTTGGTTATTGAATAATAA   |     |
| clone 33-96 | AGTGCCTTAATTGGGATGAAGTATAGCTAGATTTTGGTTATTGAATAATAA   |     |
| clone 33-98 | AGTGCCTTAATTGGGATGAAGTATAGCTAGATTTTGGTTATTGAATAATAA   |     |
| MaA81       | AATCCAATAGAGAAACAGGTCCCTTAGAAAAGACAATACTTTAGATAGCTA   | 150 |
| clone 32-88 | GATTTAATTGAGGATTAGGTTTTTTAGTAAAGATAAATTTTTTGAGAGTTA   |     |
| clone 32-92 | GATTTGATTGAGGATTAGGTTTTTTAGTAAAGATAAATTTTTTGAGAGTTA   |     |
| clone 32-93 | GATTTAATTGAGGATTAGGTTTTTTAGTAAAGATAAATTTTTTGAGAGTTA   |     |
| clone 33-96 | GATTTGATTGAGGATTAGGTTTTTTAGTAAAGATAAATTTTTTGAGAGTTA   |     |
| clone 33-98 | GATTTAATTGAGGATTAGGTTTTTTAGTAAAGATAAATTTTTTGAGAGTTA   |     |
| MaA81       | GACTCTAGGTGCACCTGTCTCTGATGATGAGCAACCAGATTACCTAGAAA    | 200 |
| clone 32-88 | GATTTTAGGTGTATTTGTTTTTTGATGATGAGTAATTAGAATATATAGAGG   |     |
| clone 32-92 | GATTTTAGGTGTATTTGTTTTTTGATGATGAGTAATTAGAATATTTAGAGG   |     |
| clone 32-93 | GATTTTAGGTGTATTTGTTTTTTGATGATGAGTAATTAGAATATTTAGAGG   |     |
| clone 33-96 | GATTTTAGGTGTATTTGTTTTTTGATGATGAGTAATTAGAATATTTAGAGG   |     |
| clone 33-98 | GATTTTAGGTGTATTTGTTTTTTGATGATGAGTAATTAGAATATTTAGAGG   |     |
| MaA81       | TTCATCCTCATGAAAAGTTCAAACAAGGTGGGCCACCACCTAAACTTTTA    | 250 |
| clone 32-88 | TTGATTTATTAGAAGAGTTTAAAGTAAGGTGGATTATTATTTAAATTTTTTA  |     |
| clone 32-92 | TTGATTTTTTTAGAAGAGTTTAAAGTAAGGTGGATTATTATTTAAATTTTTTA |     |
| clone 32-93 | TTGATTTTTTTAGAAGAGTTTAAAGTAAGGTGGATTATTATTTAAATTTTTTA |     |
| clone 33-96 | TTGATTTTTTTAGAAGAGTTTAAAGTAAGGTGGATTATTATTTAAATTTTTTA |     |
| clone 33-98 | TTGATTTTTTTAGAAGAGTTTAAAGTAAGGTGGATTATTATTTAAATTTTTTA |     |
| MaA81       | AAGTCAATGTCTCCACACTAGGTAAGTCTAAAAGGCTTTTTTAGATCTAGA   | 300 |
| clone 32-88 | AGGATAATGTTTTTATATTAGGTAAGTTTTAAAAGGTTTTTTTAGATCTAGA  |     |
| clone 32-92 | AGGATAATGTTTTTATATTAGGTAAGTTTTAAAAGGTTTTTTTAGATCTAGA  |     |
| clone 32-93 | AGGATAATGTTTTTATATTAGGTAAGTTTTAAAAGGTTTTTTTAGATCTAGA  |     |
| clone 33-96 | AGGATAATGTTTTTATATTAGGTAAGTTTTAAAAGGTTTTTTTAGATCTAGA  |     |
| clone 33-98 | AGGATAATGTTTTTATATTAGGTAAGTTTTAAAAGGTTTTTTTAGATCTAGA  |     |
| MaA81       | CTAACATTACTCTTAGTAGGACAGACATAAATAATCAAAGCCCCAGGTGCG   | 350 |
| clone 32-88 | CTAACATTACTTTTTGTAGGAAAGATATATATAAATTAAGTTTTTAGGTTG   |     |
| clone 32-92 | CTAACATTACTTTTTGTAGGAAAGATATATATAAATTAAGTTTTTAGGTTG   |     |
| clone 32-93 | CTAACATTACTTTTTGTAGGAAAGATATATATAAATTAAGTTTTTAGGTTG   |     |
| clone 33-96 | CTAACATTACTTTTTGTAGGAAAGATATATATAAATTAAGTTTTTAGGTTG   |     |
| clone 33-98 | CTAACATTACTTTTTGTAGGAAAGATATATATAAATTAAGTTTTTAGGTTG   |     |
| MaA81       | AGAAGACTTTTTCGAACAACGACCAAAGATACATCCATCGACTTAATGAAT   | 400 |
| clone 32-88 | AGAAGAGTCTTTGAATAATGATTAAGGATATGGGTATTGATTTAATGAAT    |     |
| clone 32-92 | AGAAGAGTCTTTGAATAATGATTAAGGATATGGGTATTGATTTAATGAAT    |     |
| clone 32-93 | AGAAGAGTCTTTGAATAATGATTAAGGATATGGGTATTGATTTAATGAAT    |     |
| clone 33-96 | AGAAGAGTCTTTGAATAATGATTAAGGATATGGGTATTGATTTAATGAAT    |     |
| clone 33-98 | AGAAGAGTCTTTGAATAATGATTAAGGATATGGGTATTGATTTAATGAAT    |     |
| MaA81       | GCCTCAACCGACATCTCTCTCAATCAATCAAAGGAATCCAAGTGCCTCAT    | 450 |
| clone 32-88 | GCCTCAACCGACATTTTTCTTAATTAATTAAGGAAAGTAAGTGCCTCAT     |     |
| clone 32-92 | GCCTCAACCGACATTTTTCTTAATTAATTAAGGAAAGTAAGTGCCTCAT     |     |
| clone 32-93 | GCCTCAACCGACATTTTTCTTAATTAATTAAGGAAAGTAAGTGCCTCAT     |     |

clone 33-96 GCCTCAACCGACATTTTTCTTAATTAATTAAGGAAAGTAAGTGCCTCAT  
clone 33-98 GCCTCAACCGACATTTTTCTTAATTAATTAAGGAAAGTAAGTGCCTCAT  
  
MaA81 TAAACTTAGAGCCAGGTGGTTGACCTGAGTAAGTAAAATTTCTAATTACC 500  
clone 32-88 TAAACTTAGAACCAGGTGGTTGATTTGAGTAAGGAAAATTTTAATTATT  
clone 32-92 TAAACTTAGAACCAGGTGGTTGATTTGAGTAAGGAAAATTTTAATTATT  
clone 32-93 TAAACTTAGAACCAGGTGGTTGATTTGAGTAAGGAAAATTTTAATTATT  
clone 33-96 TAAACTTAGAACCAGGTGGTTGATTTGAGTAAGGAAAATTTTAATTATT  
clone 33-98 TAAACTTAGAACCAGGTGGTTGATTTGAGTAAGGAAAATTTTAATTATT  
  
MaA81 CACTAGCTATGCACTTAGGTAAGTCAAGCAACCTTCTGTCTCGATCAG 550  
clone 32-88 TGTGAGTTAAGTATTTAGGTAATGTCAACGAACCTGCTGTCTCGATTAG  
clone 32-92 TGTGAGTTAAGTATTTAGGTAATGTCAACGAACCTGCTGTCTCGATTAG  
clone 32-93 TGTGAGTTAAGTATTTAGGTAATGTCAACGAACCTGCTGTCTCGATTAG  
clone 33-96 TGTGAGTTAAGTATTTAGGTAATGTCAACGAACCTGCTGTCTCGATTAG  
clone 33-98 TGTGAGTTAAGTATTTAGGTAATGTCAACGAACCTGCTGTCTCGATTAG  
  
MaA81 GCTAACGGTCCCATGAAGAGGAGCTATAGCTCTATCTAACATGTAAGTGA 600  
clone 32-88 GTTAATGGTTTTTATGAAGAGGAGTTATAGTTTTTATCTAACATGTAAGTGA  
clone 32-92 GTTAATGGTTTTTATGAAGAGGAGTTATAGTTTTTATCTAACATGTAAGTGA  
clone 32-93 GTTAATGGTTTTTATGAAGAGGGGTTATAGTTTTTATCTAACATGTAAGTGA  
clone 33-96 GTTAATGGTTTTTATGAAGAGGAGTTATAGTTTTTATCTAACATGTAAGTGA  
clone 33-98 GTTAATGGTTTTTATGAAGAGGGGTTATAGTTTTTATCTAACATGTAAGTGA  
  
MaA81 TGTGTCTCTAAATTGCAAAGTTTATAGATGATAACCCAGCTCATTCAA 650  
clone 32-88 TGTGATCTCTAAATTGCAAAGTTTATAGATGATAATTTAGTTTTATTTAA  
clone 32-92 TGTGATCTCTAAATTGCAAAGTTTATAGATGATAATTTAGTTTTATTTAA  
clone 32-93 TGTGATCTCTAAATTGCAAAGTTTATAGATGATAATTTAGTTTTATTTAA  
clone 33-96 TGTGATCTCTAAATTGCAAAGTTTATAGATGATAATTTAGTTTTATTTAA  
clone 33-98 TGTGATCTCTAAATTGCAAAGTTTATAGATGATAATTTAGTTTTATTTAA  
  
MaA81 ATGTAGGTGGTCTTTTAAAGAGCGATATGCTTTCATCAATCTCAAGAGTC 700  
clone 32-88 ATGTAGGTGGTTTTTTTAAATAGTGATATGTTTTTATTAATTTTAAGAGTT  
clone 32-92 ATGTAGGTGGTGTTTTTAAATAGTGATATGTTTTTATTAATTTTAAGAGTT  
clone 32-93 ATGTAGGTGGTTTTTGTAAATAGTGATATGTTTTTATTAATTTTAAGAGTT  
clone 33-96 ATGTAGGTGGTTTTTGTAAATAGTGATATGTTTTTATTAATTTTAAGAGTT  
clone 33-98 ATGTAGGTGGTTTTTTTAAATAGTGATATGTTTTTATTAATTTTAAGAGTT  
  
MaA81 TCAGAGGACCATATGAATCAATCAAACCTCAACGATCACTGATATAGTAGC 750  
clone 32-88 TTAGAGGATTATATGAGTTAATCCAACCTCCACGATCACTGATATAGTAGC  
clone 32-92 TTAGAGGATTATATGAATTAATCCAACCTCCACGATCACTGATATAGTAGC  
clone 32-93 TTAGAGGATTATATGAGTTAATCCAACCTCCACGATCACTGATATAGTAGC  
clone 33-96 TTAGAGGATTATATGAGTTAATCCAACCTCCACGATCACTGATATAGTAGC  
clone 33-98 TTAGAGGATTATATGAATTAATCCAACCTCCACGATCACTGATATAGTAGC  
  
MaA81 ATTGGTGGTGAAAGACCAATCTAATCTAGAACCACCTTAGGTATATGATG 800  
clone 32-88 ATTGGTGGTGAAAGACCAATCTAATCTAGAACCACCTTAGGTATATGATG  
clone 32-92 ATTGGTGGTGAAAGACCAATCTAATCTAGAACCACCTTAGGTATATGATG  
clone 32-93 ATTGGTGGTGAAAGACCAATCTAATCTAGAACCACCTTAGGTATATGATG  
clone 33-96 ATTGGTGGTGAAAGACCAATCTAATCTAGAACCACCTTAGGTATATGATG  
clone 33-98 ATTGGTGGTGAAAGACCAATCTAATCTAGAACCACCTTAGGTATATGATG  
  
MaA81 TGCAACTAAGAATTAACAAATTCAGAACCTCCATTTACAACCTTATCTCC 850  
clone 32-88 TGTAATTAAGAATTAACAAATTCAGAATTTTTATGTATAATTTTATTTTT  
clone 32-92 TGTAATTAAGAATTAACAAATTCAGAATTTTTATGTATAATTTTATTTTT  
clone 32-93 TGTAATTAAGAATTAACAAATTCAGAATTTTTATGTATAATTTTATTTTT  
clone 33-96 TGTAATTAAGAATTAACAAATTCAGAATTTTTATGTATAATTTTATTTTT  
clone 33-98 TGTAATTAAGAATTAACAAATTCAGAATTTTTATGTATAATTTTATTTTT  
  
MaA81 AGCAAGACCAACCTGGACTGGAGCTACTAAGAAATCATTCCCTCGTGATTC 900  
clone 32-88 AGTAAGATTAATTTGG  
clone 32-92 AGTAAGATTAATTTGG  
clone 32-93 AGTAAGATTAATTTGG

clone 33-96 AGTAAGATTAATTTGG  
clone 33-98 AGTAAGATTAATTTGG
