# Supplementary material
Source: PubMed Central journal article supplement (PMC149826)
Supplement: nar_31_5_1387_v2_2.pdf [file nar_31_5_1387_v2_2.pdf]

Alignment of pCE7 sequences obtained from bisulphite treated DNA  
 Clones 2-x are from micronuclear DNA, clones 3-x from anlagen DNA  
 Clones are from different DNA preparations

|           |                                                      |     |
|-----------|------------------------------------------------------|-----|
| pCE7      | TGCTCGAAAAGACGAGATGTTTCAGGCCGAAACGCTGAAGCAGCGGGCCATG | 50  |
| clone 1-4 | AGATGTTT TAGGTGGAAATGTTGAAGTAGTGGGTTATG              |     |
| clone 2-5 | AGATGTTT TAGGTGGAAATGTTGAAGTAGTGGGTTATG              |     |
| clone 2-9 | AGATGTTT TAGGTGGAAATGTTGAAGTAGTGGGTTATG              |     |
| clone 3-5 | AGATGTTT TAGGTGGAAATGTTGAAGTAGTGGGTTATG              |     |
| clone 3-7 | AGATGTTT TAGGTGGAAATGTTGAAGTAGTGGGTTATG              |     |
| clone 4-6 | AGATGTTT TAGGTGGAAATGTTGAAGTAGTGGGTTATG              |     |
| <br>      |                                                      |     |
| pCE7      | TGCTATTGCTAACATCATTACCGGAAGATGAATATTCAGCAGAGCAAGTG   | 100 |
| clone 1-4 | TGTTATTGTTAATATTATTATTGGAAGATGAATATTTAGTAGAGTAAGTG   |     |
| clone 2-5 | TGTTATTGTTAATATTATTATTGGAAGATGAATATTTAGTAGAGTAAGTG   |     |
| clone 2-9 | TGTTATTGTTAATATTATTATTGGAAGATGAATATTTAGTAGAGTAAGTG   |     |
| clone 3-5 | TGTTATTGTTAATATTATTATTGGAAGATGAATATTTAGTAGAGTAAGTG   |     |
| clone 3-7 | TGTTATTGTTAATATTATTATTGGAAGATGAATATTTAGTAGAGTAAGTG   |     |
| clone 4-6 | TGTTCTTGTTAATATTATTATTGGAAGATGAATATTTAGTAGAGTAAGTG   |     |
| <br>      |                                                      |     |
| pCE7      | GCTGATTGTTACCGTCTGCGATGGCAAATGAACTGGCTTTTAAGCGGCT    | 150 |
| clone 1-4 | GTTGATTGTTATTGTTTGTGATGGTAAATGAAATGGTTTTTAAGTGGTT    |     |
| clone 2-5 | GTTGATTGTTATTGTTTGTGATGGTAAATGAAATGGTTTTTAAGTGGTT    |     |
| clone 2-9 | GTTGATTGTTATTGTTTGTGATGGTAAATGAAATGGTTTTTAAGTGGTT    |     |
| clone 3-5 | GTTGATTGTTATTGTTTGTGATGGTAAATGAAATGGTTTTTAAGTGGTT    |     |
| clone 3-7 | GTTGATTGTTATTGTTTGTGATGGTAAATGAAATGGTTTTTAAGTGGTT    |     |
| clone 4-6 | GTTGATTGTTATTGTTTGTGATGGTAAATGAAATCGGTTTTTAAGTGGTT   |     |
| <br>      |                                                      |     |
| pCE7      | CAAAAAGTTTGCTGCACCTGGATGCTTTGGCTGCAAAGGAACCTGAACTCG  | 200 |
| clone 1-4 | TAAAAGTTTGTTGTATCTGGATGTTTTGTGTGTAAAGGAATTTGAATTTG   |     |
| clone 2-5 | TAAAAGTTTGTTGTATCTGGATGTTTTGTGTGTAAAGGAATTTGAATTTG   |     |
| clone 2-9 | TAAAAGTTTGTTGTATCTGGATGTTTTGTGTGTAAAGGAATTTGAATTTG   |     |
| clone 3-5 | TAAAAGTTTGTTGTATCTGGATGTTTTGTGTGTAAAGGAATTTGAATTTG   |     |
| clone 3-7 | TAAAAGTTTGTTGTATCTGGATGTTTTGTGTGTAAAGGAATTTGAATTTG   |     |
| clone 4-6 | TAAAAGTTTGTTGTATCTGGATGTTTTGTGTGTAAAGGAATTTGAATTTG   |     |
| <br>      |                                                      |     |
| pCE7      | CGAAAAGCGTGGATATTTGCTAATCATCTCGCCGCATTTTAAATTGACGAC  | 250 |
| clone 1-4 | TGAAAAGTGTGGATATTTGTTAATTTATTTGTTGTATTTTAAATTGATGAT  |     |
| clone 2-5 | TGAAAAGTGTGGATATTTGTTAATTTATTTGTTGTATTTTAAATTGATGAT  |     |
| clone 2-9 | TGAAAAGTGTGGATATTTGTTAATTTATTTGTTGTATTTTAAATTGATGAT  |     |
| clone 3-5 | TGAAAAGTGTGGATATTTGTTAATTTATTTGTTGTATTTTAAATTGATGAT  |     |
| clone 3-7 | TGAAAAGTGTGGATATTTGTTAATTTATTTGTTGTATTTTAAATTGATGAT  |     |
| clone 4-6 | TGAAAAGTGTGGATATTTGTTAATTTATTTGTTGTATTTTAAATTGATGAT  |     |
| <br>      |                                                      |     |
| pCE7      | ATAATCCAGCCATCGCTGGATTTCCCCCCAGAAGTGCCGGATCTTATAA    | 300 |
| clone 1-4 | ATGATTTAGTTATTGTTGGATTTTTTTTTT AGAAGTGTGGATTTTATAA   |     |
| clone 2-5 | ATGATTTAGTTATTGTTGGATTTTTTTTTT TAGAAGTGTGGATTTTATAA  |     |
| clone 2-9 | ATGATTTAGTTATTGTTGGATTTTTTTTTT AGAAGTGTGGATTTTATAA   |     |
| clone 3-5 | ATGATTTAGTTATTGTTGGATTTTTTTTTT TAGAAGTGTGGATTTTATAA  |     |
| clone 3-7 | ATGATTTAGTTATTGTTGGATTTTTTTTTT AGAAGTGTGGATTTTATAA   |     |
| clone 4-6 | ATGATTTAGTTATTGTTGGATTTTTTTTTT AGAAGTGTGGATTTTATAA   |     |
| <br>      |                                                      |     |
| pCE7      | ATTAATTGCATGAATTTGGAAAGCCAATTTATAATGAATCTATATTGAAT   | 350 |
| clone 1-4 | ATTAATTGTATGAATTTGGAAAGTTAATTTATAATGAATTTATATTGAAT   |     |
| clone 2-5 | ATTAATTGTATGAATTTGGAAAGTTAATTTATAATGAATTTATATTGAAT   |     |
| clone 2-9 | ATTAATTGTATGAATTTGGAAAGTTAATTTATAATGAATTTATATTGAAT   |     |
| clone 3-5 | ATTAATTGTATGAATTTGGAAAGTTAATTTATAATGAATTTATATTGAAT   |     |
| clone 3-7 | ATTAATTGTATGAATTTGGAAAGTTAATTTATAATGAATTTATATTGAAT   |     |
| clone 4-6 | ATTAATTGTATGAATTTGGAAAGTTAATTTATAATGAATTTATATTGAAT   |     |
| <br>      |                                                      |     |
| pCE7      | TCCACTAATGAATAAGAGATATTTCCAATTTTAAATTTAAAGATAAATACAG | 400 |
| clone 1-4 | TTTATTAATGAATAAGAGATATTTTAAATTTTAAATTTAAAGATAGATATAG |     |
| clone 2-5 | TTTATTAATGAATAAGAGATATTTTAAATTTTAAATTTAAAGATAGATATAG |     |

|           |                                                       |     |
|-----------|-------------------------------------------------------|-----|
| clone 2-9 | TTTATTAATGAATAAGAGATATTTTAAATTTTAAATTTAAAGATAGATATAG  |     |
| clone 3-5 | TTTATTAATGAATAAGAGATATTTTAAATTTTAAATTTAAAGATAGATATAG  |     |
| clone 3-7 | TTTATTAATGAATAAGAGATATTTTAAATTTTAAATTTAAAGATAGATATAG  |     |
| clone 4-6 | TTTATTAATGAATAAGAGATATTTTAAATTTTAAATTTAAAGATAGATATAG  |     |
| pCE7      | TTAATACTCAAATATAATAAAATTATAAAGAAAAATAAAAAATGTTTGAAAC  | 450 |
| clone 1-4 | TTAATATTTAAATATAATAAAATTATAAAGAAAAATAAAAAATGTTTGAAAC  |     |
| clone 2-5 | TTAATATTTAAATATAATAAAATTATAAAGAAAAATAAAAAATGTTTGAAAC  |     |
| clone 2-9 | TTAATATTTAAATATAATAAAATTATAAAGAAAAATAAAAAATGTTTGAAAC  |     |
| clone 3-5 | TTAATATTTAAATATAATAAAATTATAAAGAAAAATAAAAAATGTTTGAAAC  |     |
| clone 3-7 | TTAATATTTAAATATAATAAAATTATAAAGAAAAATAAAAAATGTTTGAAAC  |     |
| clone 4-6 | TTAATATTTAAATATAATAAAATTATAAAGAAAAATAAAAAATGTTTGAAAC  |     |
| pCE7      | TAACTATAGGAATTCCTACTTCCAGGCTACACTGGCCACGTTCCAGGCAAA   | 500 |
| clone 1-4 | TAACTATAGGAATTTTATTTTTCAGGTTATATTGGTTATGTTTCAGGTAAA   |     |
| clone 2-5 | TAACTATAGGAATTTTATTTTTCAGGTTATATTGGTTATGTTTCAGGTAAA   |     |
| clone 2-9 | TAACTATAGGAATTTTATTTTTCAGGTTATATTGGTTATGTTTCAGGTAAA   |     |
| clone 3-5 | TAACTATAGGAATTTTATTTTTCAGGTTATATTGGTTATGTTTCAGGTAAA   |     |
| clone 3-7 | TAACTATAGGAATTTTATTTTTCAGGTTATATTGGTTATGTTTCAGGTAAA   |     |
| clone 4-6 | TAACTATAGGAATTTTATTTTTCAGGTTATATTGGTTATGTTTCAGGTAAA   |     |
| pCE7      | ATCGAAAAATGACATGCCTCCTGATAACAAAGAACCAAGAAAGCACATTC    | 550 |
| clone 1-4 | ATTGAAAAATGATATGTTTTTTTGATAATAAAGAATTAAGAAAGTATATTTTC |     |
| clone 2-5 | ATTGAAAAATGATATGTTTTTTTGATAATAAAGAATTAAGAAAGTATATTTTC |     |
| clone 2-9 | ATTGAAAAATGATATGTTTTTTTGATAATAAAGAATTAAGAAAGTATATTTTC |     |
| clone 3-5 | ATTGAAAAATGATATGTTTTTTTGATAATAAAGAATTAAGAAAGTATATTTTC |     |
| clone 3-7 | ATTGAAAAATGATATGTTTTTTTGATAATAAAGAATTAAGAAAGTATATTTTC |     |
| clone 4-6 | ATTGAAAAATGATATGTTTTTTTGATAATAAAGAATTAAGAAAGTATATTTTC |     |
| pCE7      | AGGTATATTTGAACATTAGTAACCTAAGTGGATCATAGGTTATGGTGGAT    | 600 |
| clone 1-4 | AGGTATATTTGAATATTAGTAATTAAGTGGATTATAGGTTATGGTGGAT     |     |
| clone 2-5 | AGGTATATTTGAATATTAGTAATTAAGTGGATTATAGGTTATGGTGGAT     |     |
| clone 2-9 | AGGTATATTTGAATATTAGTAATTAAGTGGATTATAGGTTATGGTGGAT     |     |
| clone 3-5 | AGGTATATTTGAATATTAGTAATTAAGTGGATTATAGGTTATGGTGGAT     |     |
| clone 3-7 | AGGTATATTTGAATATTAGTAATTAAGTGGATTATAGGTTATGGTGGAT     |     |
| clone 4-6 | AGGTATATTTGAATATTAGTAATTAAGTGGATTATAGGTTATGGTGGAT     |     |
