# Supplementary material
Source: PubMed Central journal article supplement (PMC149826)
Supplement: nar_31_5_1387_v2_3.pdf [file nar_31_5_1387_v2_3.pdf]

Summary of the investigated sequence of pCE7, MaA81 and pL01. a) sequence of pCE7. No cytosine methylation was observed in the processed DNA-molecules in the mature macronucleus. The pattern of cytosine methylation is identical in Micronuclei and macronuclear anlagen. Bold underlined sequences correspond to the 1.1kb MDS, thin underlined sequences to the 1.3kb MDS. [ ] marks the IESs. Bold characters represent *cis*-acting sequences involved in the fragmentation of these MDSs. White on black characters show the position of the methylated cytosines. b) Sequence of MaA81 from Micronuclei and macronuclear anlagen. White on black characters show the position of the methylated cytosines. Fat characters show the C<sub>4</sub>A<sub>4</sub> Box. Underlined is the 2.6kb gsp. c) sequence of pLJ01.

Sequences between the investigated sequences are not shown.

a)

```

pCE7      AGATGTTTCAG GCGGAAACGC TGAAGCAGCG GGCCATGTGC TATTGCTAAC
pCE7      ATCATTACCG GAAGATGAAT ATTCAGCAGA GCAAGTGGCT GATTGTTACC
pCE7      GTCTGCGATG GCAAATTGAA CTGGCTTTTA AGCGGCTCAA AAGTTTGCTG
pCE7      CACCTGGATG CTTTGGCTGC AAAGGAACCT GAACTCGCGA AAGCGTGGAT
pCE7      ATTTGCTAAT CATCTCGCCG CATTTTAAAT TGACGACATA ATCCAGCCAT
pCE7      CGCTGGATTT CCCCCCAGA AGTGCCGGAT CTTATAAATT AATTGCATGA
pCE7      ATTTGAAAAG CCAATTTATA ATGAATCTAT ATTGAATTCC ACTAATGAAT
pCE7      AAGAGATATT CCAATTTTAA TTTAAAGATA AATACAGTTA ATACTCAAAT
pCE7      ATAATAAATT ATAAAGAAAA ATAAAAATGT TTGAAACTAA CTATAGGAAT
pCE7      TCCACTTCCA GGCTACACTG GCCACGTTC AGGCAAAATC GAAAATGACA
pCE7      TGCCTCCTGA TAACAAAAGAA CCAAGAAAAGC ACATTCCAGG TATATTTGAA
pCE7      CATTAGTAAC TAAGTGGATC ATAGGTTATG GTGGATACGT TCCAGGTGTT
pCE7      AAGAGTGAAA ATGTTTTTGG ATAGACCTAT GGAAAAACCA GCTATCAATC
pCE7      XXX576nXXX CTCTTAGATA AACATCGCAA TTTGTGCCAG AATATAAGAG
pCE7      ACCAAAACAA GACGATCTTT GG[TATTTCA AATTATAGTA TATATTTTTG
pCE7      AAAGG]TATT GAAATCAGAT AACTCGCAAC TTAATCTCAG AAAGCATAAT
pCE7      ACTCAATATT CTCTAGCTTA TATTTTAAAG TATTTAAAGT TCAAATTTCT
pCE7      TCTAAAATCT TTGAATTATA CGATCATAAA CTGATTACTC AGTCCAGGAT
pCE7      TCTTTAGAAT AATATTTAAT GAAAATAATT ACAAAAATTA ATTACTTATA
pCE7      TCCCAGTTAT TTTTAATAAA TCAAACAAAT AAATACGTAA CTATAACACA
pCE7      AGGCAGGAAA ATTGCTACTC TCAGATATTC XXX262nXXX AACGAGTCTC
pCE7      GTGGTCTATA CATTGCTCGA AGGTAAGCCT CAGAGAACAC TTCTTGGTGC
pCE7      ATTTCTTCTT GAGAGTCTGC CATTTAACAT TT[GGAGTTT GAG]ACAATG
pCE7      ATTTGAGTTT AGACTCTGTT TCTAGCAGTT TATGGACGTA ATTTAGGGAT
pCE7      ACAAGATCTC CGGGCTCTGT ACCTCATGCT TAAATAGGAC GACGTCTTCA

```

pCE7 TAAGGACGTA CCTTCTCAAA GCGAGGAAGA TGCTTTGAAA GTATTCTATG  
pCE7 GAGTTGAAGA ACCCAAAAAAC CAAGCTCCAA GAAATGGAGA TCCCATTCCA  
pCE7 GGCTACAGTG GGGTAAACAG AAGAGTATAG GCTGACAACG TATCGTATGA  
pCE7 CTTATGCGAG GCATGAAGAA GAGCCCAAGA AAGCTAAAAAT AGAATAACTA  
pCE7 CTGAGAAAGG AGAGACTCTT AGATAAACAT CGCAATTGTG CCAGAATATA  
pCE7 AGAGACCAAA ACAAGACGAT CTGGTATTTT AAATATAGTA TATATTTTTG  
pCE7 AAAGGTATTG AAATCAGATA ACTCGCAACT TAATCTCAGA AAGCATAATA  
pCE7 CTCAATATTC TCTAGCTTAT ATTTTTAAGT ATTTAAAGTT CAAATTTCTT  
pCE7 CTAAAATCTT TGAATTATAC GATCATAAAC TGATTACTCA GTCCAGGATT  
pCE7 CTTTAGAATA ATATTTAATG AAAATAATTA CAAAAATTA TTAATTTATAT  
pCE7 CCCAGTTATT TTTAATAAAT CAAACAAATA AATACGTAAC TATAACACAA  
pCE7 GGCAGGAAAA TTGCTACTCT CAGATATTCT CTTATTCTTT GTAAATATTT  
pCE7 ATAGATTTCA CAGCAATTAA GCTGTTTTCA ATGTTTTAAT TAATGTTACA  
pCE7 AGGGGATGCT TCGGTAAAT ACTGAACCAG ACTTTCAGAG CGATATCTAG  
pCE7 GACTGTTGAA ATCATCAGTG CTGCTGTAAG AGTCCCCGTC GGAGAATGAT  
pCE7 TTGAGTGAAA AGTTGCGAGA ATCGGAGTCA AATGTTTCTC CGCCATCACT  
pCE7 CTCAAAGTGT GACATATTCC TCTTATGACT CTTTATAAAT TCCAATTATC  
pCE7 TCATTTTCATC CTCACCTTTC TCTGTTATGT TAGCAAATAA AACGAGTCTC  
pCE7 GTGGTCTATA CATTGCTCGA AGGTAAGCCT CAGAGAACAC TTCTTGGTGC  
pCE7 ATTTCTTCTT GAGAGTCTGC CATTTAACAT TTGGAGTTTG AGACAATGAT  
pCE7 TTGAGTTTAG ACTCTGTTTC TAGCAGTTTA TGGACGTAAT TTAGGGATAC  
pCE7 AAGATCTCCG GGCTCTGTAC CTCATGCTTA AATAGGACGA CGTCTTCATA  
pCE7 AGGACGTACC TTCTCACTAA TGATTGACTG GCTTAGACTA TACATACAAT  
pCE7 GAAAAACATGA AAACATGAAA TTTGTAGACG TTACTTTTCA TTCTAGGGTT  
pCE7 CTTTGTAAAT CATCTCAAAG TTGCCATGTG CAAATTGACA TTT[TAATTG  
pCE7 CTTCAATAAT TATTGTGCTT ATATGGGATT ATAATAAGAA TGAGTAGACA  
pCE7 TTT]GTGGCC ATATCTGCAT TACCAACTCT ATCCAGTTTA CACATTCAGT  
pCE7 CTTATACTTG CCTTATCAAC CTAGTATTCT TTTGAGTAAC CTACTATAGC  
pCE7 TATTTGTTCT GCAGAGTTTA CTGATGATTC ATTAGCTGGA ATTGGGGATT  
pCE7 GGCGGTTTGA ACCATCATTC CATGATTGGT ATAATCGAAG TAGAAACGTT  
pCE7 GCTAGTTTTG CTGAATCTAT TAGAGTTTAT CGAAATTTTG GCCGCTAATT  
pCE7 TGACTCTTGT TG

b)

MAA81, Mic TTTGGTAACC CCCGAACTTG GGAACCATTC GCATATTGCT CGATCCTCAT  
MAA81, Anlage TTTGGTAACC CCCGAACTTG GGAACCATTC GCATATTGCT CGATCCTCAT

MAA81, Mic AAATGGTAGC TCTGCTACAT TTTACACAT TCTTAATTTA GACTATGCGA  
MAA81, Anlage AAATGGTAGC TCTGCTACAT TTTACACAT TCTTAATTTA GACTATGCGA

MAA81, Mic GTAGTCTATC GAGCATCATT TCATATTTCA CTTCTTAGGG TACGTGGTGC  
 MAA81, Anlage GTAGTCTATC GAGCATCATT TCATATTTCA CTTCTTAGGG TACGTGGTGC  
  
 MAA81, Mic TCACTTTGCT TTCGCACTCT TGCTCCACCT ATATCTCTAA TTTTAAATTC  
 MAA81, Anlage TCACTTTGCT TTCGCACTCT TGCTCCACCT ATATCTCTAA TTTTAAATTC  
  
 MAA81, Mic AAATCTATAA TTTTAAATTT AAAGTTAAGA AAGTAATGGT ACGCGACTAC  
 MAA81, Anlage AAATCTATAA TTTTAAATTT AAAGTTAAGA AAGTAATGGT ACGCGACTAC  
  
 MAA81, Mic AAGTGCCAAG GTGCAATAAG GTCTTCGAAT XXX136nXXX GAAATCACAA  
 MAA81, Anlage AAGTGCCAAG GTGCAATAAG GTCTTCGAAT XXX136nXXX GAAATCACAA  
  
 MAA81, Mic GAGGAAGTGC TTAATTGGAA TGAAGTATAG CTAGATCCTG GCTATCGAAC  
 MAA81, Anlage GAGGAAGTGC TTAATTGGAA TGAAGTATAG CTAGATCCTG GCTATCGAAC  
  
 MAA81, Mic AATAAAATCC AATAGAGAAA CAGGTCCTTA GAAAAGACAA TACTTTAGAT  
 MAA81, Anlage AATAAAATCC AATAGAGAAA CAGGTCCTTA GAAAAGACAA TACTTTAGAT  
  
 MAA81, Mic AGCTAGACTC TAGGTGCACC TGTCTCTGAT GATGAGCAAC CAGATTACCT  
 MaA81, Anlage AGCTAGACTC TAGGTGCACC TGTCTCTGAT GATGAGCAAC CAGATTACCT  
  
 MaA81, Mic AGAAATTCAT CCTCATGAAA AGTTCAAACA AGGTGGGCCA CCACCTAAAC  
 MaA81, Anlage AGAAATTCAT CCTCATGAAA AGTTCAAACA AGGTGGGCCA CCACCTAAAC  
  
 MaA81, Mic TTTTAAAGTC AATGTCTCCA CACTAGGTAA GTCTAAAAGG CTTTTTAGAT  
 MaA81, Anlage TTTTAAAGTC AATGTCTCCA CACTAGGTAA GTCTAAAAGG CTTTTTAGAT  
  
 MaA81, Mic CTAGACTAAC ATTACTCTTA GTAGGACAGA CATAAATAAT CAAAGCCCCA  
 MaA81, Anlage CTAGACTAAC ATTACTCTTA GTAGGACAGA CATAAATAAT CAAAGCCCCA  
  
 MaA81, Mic GGTCGAGAAG ACTTTTCGAA CAACGACCAA AGATACATCC ATCGACTTAA  
 MaA81, Anlage GGTCGAGAAG ACTTTTCGAA CAACGACCAA AGATACATCC ATCGACTTAA  
  
 MaA81, Mic TGAATGCCTC AACCGACATC TCTCTCAATC AATCAAAGGA ATCCAAGTGC  
 MaA81, Anlage TGAATGCCTC AACCGACATC TCTCTCAATC AATCAAAGGA ATCCAAGTGC  
  
 MaA81, Mic CTCATTTAAA CTTAGAGCCA GGTGGTTGAC CTGAGTAAGT AAATTCTAAT  
 MaA81, Anlage CTCATTTAAA CTTAGAGCCA GGTGGTTGAC CTGAGTAAGT AAATTCTAAT  
  
 MaA81, Mic TACCCACTAG CTATGCACTT AGGTAAAAGT CAAGCAACCT TCTGTCTCGA  
 MaA81, Anlage TACCCACTAG CTATGCACTT AGGTAAAAGT CAAGCAACCT TCTGTCTCGA

|               |            |            |            |                   |                   |
|---------------|------------|------------|------------|-------------------|-------------------|
| MaA81, Mic    | TCAGGCTAAC | GGTCCCATGA | AGAGGAGCTA | TAGCTCTATC        | TAACATGTAA        |
| MaA81, Anlage | TCAGGCTAAC | GGTCCCATGA | AGAGGAGCTA | TAGCTCTATC        | TAACATGTAA        |
| MaA81, Mic    | GTGATGTTGT | TCTCTAAATT | GCAAAGTTTA | TAGATGATAA        | CCCAGCTCAT        |
| MaA81, Anlage | GTGATGTTGT | TCTCTAAATT | GCAAAGTTTA | TAGATGATAA        | CCCAGCTCAT        |
| MaA81, Mic    | TCAAATGTAG | GTGGTTCTTT | AAAGAGCGAT | ATGCTTTCAT        | CAATCTCAAG        |
| MaA81, Anlage | TCAAATGTAG | GTGGTTCTTT | AAAGAGCGAT | ATGCTTTCAT        | CAATCTCAAG        |
| MaA81, Mic    | AGTCTCAGAG | GACCATATGA | ATCAATCAAA | CTCAACGATC        | ACTGATATAG        |
| MaA81, Anlage | AGTCTCAGAG | GACCATATGA | ATCAATCAAA | CTCAACGATC        | ACTGATATAG        |
| MaA81, Mic    | TAGCATTGGT | GGTGAAAGAC | CAATCTAATC | TAGAACCACC        | TTAGGTATGT        |
| MaA81, Anlage | TAGCATTGGT | GGTGAAAGAC | CAATCTAATC | TAGAACCACC        | TTAGGTATGT        |
| MaA81, Mic    | GATGTGCAAC | TAAGAATTAA | CAAATTCAGA | ACCTCCATTT        | ACAAC TTTAT       |
| MaA81, Anlage | GATGTGCAAC | TAAGAATTAA | CAAATTCAGA | ACCTCCATTT        | ACAAC TTTAT       |
| MaA81, Mic    | CTCCAGCAAG | ACCAACCTGG | ACTGGAGCTA | CTAAGAAATC        | ATTCCTCGTG        |
| MaA81, Anlage | CTCCAGCAAG | ACCAACCTGG | ACTGGAGCTA | CTAAGAAATC        | ATTCCTCGTG        |
| MaA81, Mic    | ATTCTAAATC | AATCCCAGTT | CACATGACCC | GAAGCAAGGA        | CAAGGTGGCC        |
| MaA81, Anlage | ATTCTAAATC | AATCCCAGTT | CACATGACCC | GAAGCAAGGA        | CAAGGTGGCC        |
| MaA81, Mic    | TGATGATCAA | XXX478nXXX | ACCCTGGGTC | TATTATAGGT        | GAAGAATTAT        |
| MaA81, Anlage | TGATGATCAA | XXX478nXXX | ACCCTGGGTC | TATTATAGGT        | GAAGAATTAT        |
| MaA81, Mic    | AAACTTCATT | CTAGATTCTC | TATGCCCCAA | AACCCCAAAA        | CCTCATTTCT        |
| MaA81, Anlage | AAACTTCATT | CTAGATTCTC | TATGCCCCAA | AACCCCAAAA        | CCTCATTTCT        |
| MaA81, Mic    | TTTGAATGA  | ATATGTAAAT | ATAAAGAAAG | TTTATAATAT        | CAACTTCCAG        |
| MaA81, Anlage | TTTGAATGA  | ATATGTAAAT | ATAAAGAAAG | TTTATAATAT        | CAACTTCCAG        |
| MaA81, Mic    | CAAAAATAC  | AGTCTTTACT | TTATATAAAA | TCTTATATAG        | GCTTATGCAA        |
| MaA81, Anlage | CAAAAATAC  | AGTCTTTACT | TTATATAAAA | TCTTATATAG        | GCTTATGCAA        |
| MaA81, Mic    | CATCTGTATG | TAATAACAAC | ATCCAATTAC | TAATAGGAGC        | AGATATGTCA        |
| MaA81, Anlage | CATCTGTATG | TAATAACAAC | ATCCAATTAC | TAATAGGAGC        | AGATATGTCA        |
| MaA81, Mic    | ACTTCACAAA | AGAGTCGACA | CATTCAAGTT | <u>TTATGGACCC</u> | <u>CAATATGGCC</u> |
| MaA81, Anlage | ACTTCACAAA | AGAGTCGACA | CATTCAAGTT | <u>TTATGGACCC</u> | <u>CAATATGGCC</u> |

MaA81, Mic      ATATTTAATA GTAAACCTAA  
MaA81, Anlage   ATATTTAATA GTAAACCTAA

c)

pLJ01            GATAAGGTGT TGGGGTTTAA TTTGAAAGAT TTGTTTATGG AAAGTGAGTT  
pLJ01            TTTATTGTTG GTATATTTGT ATGAGTGTTT GTAGGAAGTT ATTGTTTAGG  
pLJ01            AAATAGTTTA TTAGAATTAA TGTTTATTAA GAATATTTAT ATTTTTTTGT  
pLJ01            GTGTGGTTGA GAAAAGTGAT TTTGATGTGT TTTATGTTTG TGAGAATGAT  
pLJ01            ATGTTGGTTT GGAAAGTAAG TAATATTTAA ATGTTTTTTA GTAAATATGT  
pLJ01            TTTGGAGTAA TATTTTGATA TTGTATATTA GGATATTTAT ATTAATAAGT  
pLJ01            AGTTGTGTTT GATGATTTGT ATATAGGATT TGGGTGTAGT TGTGGGAATT  
pLJ01            ATTGATTTTT TTGAATTTGA GTTGGTTTAT GTTAGGATAG GAGTAGGGGT  
pLJ01            GTTGATTTTT GAAATTTTTT GTAATAAAGG TTATGTTTAT GAAGTGTTTT  
pLJ01            GTTGTTTG
